# Supplementary material
Source: publisher figshare collection journal article supplement (https://frontiersin.figshare.com/ndownloader/files/20176016)
Supplement: Supplementary file 1 [file 20176016]

**Supplementary material 2**

**Table S3**. Prey brought home by free-ranging cats in Italy.

| **Class** | **Order** | **Species** | **Number of killed individuals** | **IUCN (international)** | **IUCN (Italy)** |
| --- | --- | --- | --- | --- | --- |
| Amphibia | Anura | *Bufo balearicus* | 7 | Least Concern | Least Concern |
| Amphibia | Anura | *Bufo bufo* | 2 | Least Concern | Vulnerable |
| Amphibia | Anura | *Hyla arborea* | 4 | Least Concern | Not Evaluated |
| Amphibia | Anura | *Pelophylax* synklepton *esculentus* | 9 | Least Concern | Least Concern |
| Amphibia | Anura | *Rana dalmatina* | 38 | Least Concern | Least Concern |
| Amphibia | Anura | *Rana italica* | 1 | Least Concern | Least Concern |
| Amphibia | Anura | *Rana latastei* | 1 | Vulnerable | Vulnerable |
| Amphibia | Urodela | *Salamandra salamandra* | 1 | Least Concern | Least Concern |
| Amphibia | Urodela | *Triturus carnifex* | 1 | Least Concern | Near Threatened |
| Birds | Anseriformes | *Anas crecca* | 2 | Least Concern | Endangered |
| Birds | Anseriformes | *Anas platyrhynchos* | 3 | Least Concern | Least Concern |
| Birds | Anseriformes | *Aythya ferina* | 1 | Least Concern | Endangered |
| Birds | Apodiformes | *Apus apus* | 14 | Least Concern | Least Concern |
| Birds | Bucerotiformes | *Upupa epops* | 2 | Least Concern | Least Concern |
| Birds | Charadriiformes | *Larus michahellis* | 1 | Least Concern | Least Concern |
| Birds | Charadriiformes | *Scolopax rusticola* | 6 | Least Concern | Data Deficient |
| Birds | Charadriiformes | *Tringa erythropus* | 1 | Least Concern | Not Evaluated |
| Birds | Columbiformes | *Columba livia* forma *domestica* | 14 | Least Concern | Feral species |
| Birds | Columbiformes | *Geopelia cuneata* | 1 | Least Concern | Alien species |
| Birds | Columbiformes | *Streptopelia decaocto* | 22 | Least Concern | Least Concern |
| Birds | Columbiformes | *Streptopelia turtur* | 1 | Vulnerable | Least Concern |
| Birds | Cuculiformes | *Cuculus canorus* | 1 | Least Concern | Least Concern |
| Birds | Galliformes | *Alectoris rufa* | 3 | Least Concern | Data Deficient |
| Birds | Galliformes | *Coturnix coturnix* | 5 | Least Concern | Data Deficient |
| Birds | Galliformes | *Perdix perdix* | 1 | Least Concern | Least Concern |
| Birds | Galliformes | *Phasianus colchicus* | 22 | Least Concern | Least Concern |
| Birds | Gruiformes | *Crex crex* | 1 | Least Concern | Vulnerable |
| Birds | Gruiformes | *Fulica atra* | 1 | Least Concern | Least Concern |
| Birds | Gruiformes | *Gallinula chloropus* | 2 | Least Concern | Least Concern |
| Birds | Gruiformes | *Rallus aquaticus* | 2 | Least Concern | Least Concern |
| Birds | Passeriformes | *Acrocephalus melanopogon* | 1 | Least Concern | Vulnerable |
| Birds | Passeriformes | *Carduelis carduelis* | 19 | Least Concern | Near Threatened |
| Birds | Passeriformes | *Carduelis chloris* | 22 | Least Concern | Near Threatened |
| Birds | Passeriformes | *Carduelis corsicana* | 1 | Least Concern | Least Concern |
| Birds | Passeriformes | *Cettia cetti* | 2 | Least Concern | Least Concern |
| Birds | Passeriformes | *Cinclus cinclus* | 1 | Least Concern | Least Concern |
| Birds | Passeriformes | *Cisticola juncidis* | 1 | Least Concern | Least Concern |
| Birds | Passeriformes | *Coccothraustes coccothraustes* | 1 | Least Concern | Least Concern |
| Birds | Passeriformes | *Cyanecula svecica* | 1 | Least Concern | Least Concern |
| Birds | Passeriformes | *Cyanistes caeruleus* | 17 | Least Concern | Least Concern |
| Birds | Passeriformes | *Delichon urbicum* | 4 | Least Concern | Near Threatened |
| Birds | Passeriformes | *Emberiza cia* | 2 | Least Concern | Least Concern |
| Birds | Passeriformes | *Emberiza cirlus* | 2 | Least Concern | Least Concern |
| Birds | Passeriformes | *Emberiza citrinella* | 4 | Least Concern | Least Concern |
| Birds | Passeriformes | *Emberiza schoeniclus* | 2 | Least Concern | Near Threatened |
| Birds | Passeriformes | *Erithacus rubecula* | 20 | Least Concern | Least Concern |
| Birds | Passeriformes | *Ficedula hypoleuca* | 3 | Least Concern | Not Evaluated |
| Birds | Passeriformes | *Fringilla coelebs* | 20 | Least Concern | Least Concern |
| Birds | Passeriformes | *Galerida cristata* | 1 | Least Concern | Least Concern |
| Birds | Passeriformes | *Garrulus glandarius* | 6 | Least Concern | Least Concern |
| Birds | Passeriformes | *Hirundo rustica* | 4 | Least Concern | Near Threatened |
| Birds | Passeriformes | *Lanius collurio* | 2 | Least Concern | Vulnerable |
| Birds | Passeriformes | *Leiothrix lutea* | 2 | Least Concern | Alien species |
| Birds | Passeriformes | *Lullula arborea* | 1 | Least Concern | Least Concern |
| Birds | Passeriformes | *Luscinia megarhynchos* | 8 | Least Concern | Least Concern |
| Birds | Passeriformes | *Motacilla alba* | 7 | Least Concern | Least Concern |
| Birds | Passeriformes | *Motacilla cinerea* | 1 | Least Concern | Least Concern |
| Birds | Passeriformes | *Muscicapa striata* | 1 | Least Concern | Least Concern |
| Birds | Passeriformes | *Nucifraga caryocatactes* | 1 | Least Concern | Least Concern |
| Birds | Passeriformes | *Oriolus oriolus* | 2 | Least Concern | Least Concern |
| Birds | Passeriformes | *Parus major* | 46 | Least Concern | Least Concern |
| Birds | Passeriformes | *Passer italiae* | 79 | Vulnerable | Vulnerable |
| Birds | Passeriformes | *Passer montanus* | 11 | Least Concern | Vulnerable |
| Birds | Passeriformes | *Periparus ater* | 7 | Least Concern | Least Concern |
| Birds | Passeriformes | *Petronia petronia* | 2 | Least Concern | Least Concern |
| Birds | Passeriformes | *Phoenicurus ochruros* | 9 | Least Concern | Least Concern |
| Birds | Passeriformes | *Phoenicurus phoenicurus* | 13 | Least Concern | Least Concern |
| Birds | Passeriformes | *Phylloscopus collybita* | 2 | Least Concern | Least Concern |
| Birds | Passeriformes | *Pica pica* | 4 | Least Concern | Least Concern |
| Birds | Passeriformes | *Plectrophenax nivalis* | 1 | Least Concern | Least Concern |
| Birds | Passeriformes | *Prunella collaris* | 1 | Least Concern | Least Concern |
| Birds | Passeriformes | *Prunella modularis* | 2 | Least Concern | Least Concern |
| Birds | Passeriformes | *Ptyonoprogne rupestris* | 4 | Least Concern | Least Concern |
| Birds | Passeriformes | *Pyrrhula pyrrhula* | 1 | Least Concern | Vulnerable |
| Birds | Passeriformes | *Regulus ignicapillus* | 1 | Least Concern | Least Concern |
| Birds | Passeriformes | *Saxicola rubicola* | 1 | Least Concern | Vulnerable |
| Birds | Passeriformes | *Serinus canarius* | 1 | Least Concern | Alien species |
| Birds | Passeriformes | *Serinus serinus* | 16 | Least Concern | Least Concern |
| Birds | Passeriformes | *Sinosuthora webbiana* | 3 | Least Concern | Alien species |
| Birds | Passeriformes | *Sitta europaea* | 1 | Least Concern | Least Concern |
| Birds | Passeriformes | *Sturnus vulgaris* | 27 | Least Concern | Least Concern |
| Birds | Passeriformes | *Sylvia atricapilla* | 31 | Least Concern | Least Concern |
| Birds | Passeriformes | *Sylvia borin* | 1 | Least Concern | Least Concern |
| Birds | Passeriformes | *Sylvia communis* | 5 | Least Concern | Least Concern |
| Birds | Passeriformes | *Sylvia conspicillata* | 2 | Least Concern | Least Concern |
| Birds | Passeriformes | *Sylvia melanocephala* | 24 | Least Concern | Least Concern |
| Birds | Passeriformes | *Sylvia sarda* | 3 | Least Concern | Least Concern |
| Birds | Passeriformes | *Sylvia subalpina* | 12 | Least Concern | Least Concern |
| Birds | Passeriformes | *Sylvia undata* | 1 | Near Threatened | Vulnerable |
| Birds | Passeriformes | *Taeniopygia guttata* | 1 | Least Concern | Alien species |
| Birds | Passeriformes | *Tarsiger cyanurus* | 1 | Least Concern | Not Evaluated |
| Birds | Passeriformes | *Troglodytes troglodytes* | 3 | Least Concern | Least Concern |
| Birds | Passeriformes | *Turdus merula* | 100 | Least Concern | Least Concern |
| Birds | Passeriformes | *Turdus philomelos* | 2 | Least Concern | Least Concern |
| Birds | Passeriformes | *Turdus viscivorus* | 1 | Least Concern | Least Concern |
| Birds | Pelecaniformes | *Ardeola ralloides* | 1 | Least Concern | Least Concern |
| Birds | Piciformes | *Dendrocopos major* | 1 | Least Concern | Least Concern |
| Birds | Piciformes | *Jynx torquilla* | 2 | Least Concern | Endangered |
| Birds | Piciformes | *Picus viridis* | 3 | Least Concern | Least Concern |
| Birds | Procellariformes | *Calonectris diomedea* | 3 | Least Concern | Least Concern |
| Birds | Psittaciformes | *Agapornis fischeri* | 1 | Near Threatened | Alien species |
| Birds | Psittaciformes | *Myiopsitta monachus* | 4 | Least Concern | Alien species |
| Birds | Psittaciformes | *Psittacula krameri* | 15 | Least Concern | Alien species |
| Birds | Strigiformes | *Asio flammeus* | 1 | Least Concern | Not Evaluated |
| Birds | Strigiformes | *Asio otus* | 1 | Least Concern | Least Concern |
| Birds | Strigiformes | *Athene noctua* | 1 | Least Concern | Least Concern |
| Birds | Strigiformes | *Otus scops* | 5 | Least Concern | Least Concern |
| Birds | Strigiformes | *Tyto alba* | 1 | Least Concern | Least Concern |
| Mammals | Carnivora | *Mustela nivalis* | 8 | Least Concern | Least Concern |
| Mammals | Chiroptera | *Eptesicus serotinus* | 1 | Least Concern | Near Threatened |
| Mammals | Chiroptera | *Hypsugo savii* | 65 | Least Concern | Least Concern |
| Mammals | Chiroptera | *Miniopterus schreibersii* | 2 | Near Threatened | Least Concern |
| Mammals | Chiroptera | *Myotis mystacinus* | 1 | Least Concern | Vulnerable |
| Mammals | Chiroptera | *Myotis nattereri* | 1 | Least Concern | Vulnerable |
| Mammals | Chiroptera | *Nyctalus leisleri* | 3 | Least Concern | Near Threatened |
| Mammals | Chiroptera | *Pipistrellus kuhlii* | 50 | Least Concern | Least Concern |
| Mammals | Chiroptera | *Pipistrellus nathusii* | 1 | Least Concern | Near Threatened |
| Mammals | Chiroptera | *Pipistrellus pipistrellus* | 6 | Least Concern | Least Concern |
| Mammals | Chiroptera | *Plecotus auritus* | 1 | Least Concern | Near Threatened |
| Mammals | Chiroptera | *Rhinolophus ferrumequinum* | 3 | Near Threatened | Vulnerable |
| Mammals | Chiroptera | *Rhinolophus hipposideros* | 2 | Near Threatened | Vulnerable |
| Mammals | Chiroptera | *Tadarida teniotis* | 2 | Least Concern | Least Concern |
| Mammals | Lagomorpha | *Lepus europaeus* | 40 | Least Concern | Least Concern |
| Mammals | Lagomorpha | *Oryctolagus cuniculus* | 23 | Near Threatened | Alien species |
| Mammals | Lagomorpha | *Sylvilagus floridanus* | 46 | Least Concern | Alien species |
| Mammals | Rodentia | *Apodemus agrarius* | 1 | Least Concern | Least Concern |
| Mammals | Rodentia | *Apodemus alpicola* | 1 | Least Concern | Data Deficient |
| Mammals | Rodentia | *Apodemus flavicollis* | 47 | Least Concern | Least Concern |
| Mammals | Rodentia | *Apodemus sylvaticus* | 10 | Least Concern | Least Concern |
| Mammals | Rodentia | *Callosciurus finlaysonii* | 2 | Least Concern | Alien species |
| Mammals | Rodentia | *Chionomys nivalis* | 4 | Least Concern | Least Concern |
| Mammals | Rodentia | *Eliomys quercinus* | 3 | Near Threatened | Near Threatened |
| Mammals | Rodentia | *Eutamias sibiricus* | 1 | Least Concern | Alien species |
| Mammals | Rodentia | *Glis glis* | 25 | Least Concern | Least Concern |
| Mammals | Rodentia | *Microtus savii* | 14 | Least Concern | Least Concern |
| Mammals | Rodentia | *Mus domesticus* | 72 | Least Concern | Alien species |
| Mammals | Rodentia | *Muscardinus avellanarius* | 11 | Least Concern | Least Concern |
| Mammals | Rodentia | *Myocastor coypus* | 1 | Least Concern | Alien species |
| Mammals | Rodentia | *Myodes glareolus* | 2 | Least Concern | Least Concern |
| Mammals | Rodentia | *Phodopus sungorus* | 1 | Least Concern | Alien species |
| Mammals | Rodentia | *Rattus norvegicus* | 43 | Least Concern | Alien species |
| Mammals | Rodentia | *Rattus rattus* | 36 | Least Concern | Alien species |
| Mammals | Rodentia | *Sciurus carolinensis* | 11 | Least Concern | Alien species |
| Mammals | Rodentia | *Sciurus vulgaris* | 37 | Least Concern | Least Concern |
| Mammals | Soricomorpha | *Crocidura leucodon* | 19 | Least Concern | Least Concern |
| Mammals | Soricomorpha | *Crocidura pachyura* | 4 | Least Concern | Data Deficient |
| Mammals | Soricomorpha | *Crocidura sicula* | 1 | Least Concern | Least Concern |
| Mammals | Soricomorpha | *Crocidura suaveolens* | 19 | Least Concern | Least Concern |
| Mammals | Soricomorpha | *Sorex antinorii* | 16 | Data Deficient | Data Deficient |
| Mammals | Soricomorpha | *Sorex minutus* | 4 | Least Concern | Least Concern |
| Mammals | Soricomorpha | *Sorex samniticus* | 19 | Least Concern | Least Concern |
| Mammals | Soricomorpha | *Suncus etruscus* | 91 | Least Concern | Least Concern |
| Mammals | Soricomorpha | *Talpa caeca* | 2 | Least Concern | Data Deficient |
| Mammals | Soricomorpha | *Talpa europaea* | 17 | Least Concern | Least Concern |
| Mammals | Soricomorpha | *Talpa romana* | 2 | Least Concern | Least Concern |
| Reptiles | Squamata | *Algyroides fitzingeri* | 1 | Least Concern | Least Concern |
| Reptiles | Squamata | *Anguis veronensis* | 10 | Not Evaluated | Least Concern |
| Reptiles | Squamata | *Archaeolacerta bedriagae* | 1 | Near Threatened | Near Threatened |
| Reptiles | Squamata | *Chalcides chalcides* | 18 | Least Concern | Least Concern |
| Reptiles | Squamata | *Chalcides ocellatus* | 6 | Least Concern | Least Concern |
| Reptiles | Squamata | *Coronella austriaca* | 3 | Least Concern | Least Concern |
| Reptiles | Squamata | *Coronella girondica* | 1 | Least Concern | Least Concern |
| Reptiles | Squamata | *Elaphe quatuorlineata* | 6 | Near Threatened | Least Concern |
| Reptiles | Squamata | *Hemidactylus turcicus* | 11 | Least Concern | Least Concern |
| Reptiles | Squamata | *Hierophis carbonarius* | 10 | Not Evaluated | Least Concern |
| Reptiles | Squamata | *Hierophis viridiflavus* | 41 | Least Concern | Least Concern |
| Reptiles | Squamata | *Lacerta bilineata* | 28 | Least Concern | Least Concern |
| Reptiles | Squamata | *Lacerta viridis* | 1 | Least Concern | Least Concern |
| Reptiles | Squamata | *Malpolon monspessulanus* | 1 | Least Concern | Not Evaluated |
| Reptiles | Squamata | *Mediodactylus kotschyi* | 1 | Least Concern | Least Concern |
| Reptiles | Squamata | *Natrix natrix* | 8 | Least Concern | Least Concern |
| Reptiles | Squamata | *Podarcis filfolensis* | 12 | Least Concern | Vulnerable |
| Reptiles | Squamata | *Podarcis muralis* | 175 | Least Concern | Least Concern |
| Reptiles | Squamata | *Podarcis siculus* | 77 | Least Concern | Least Concern |
| Reptiles | Squamata | *Podarcis tiliguerta* | 3 | Least Concern | Near Threatened |
| Reptiles | Squamata | *Tarentola mauritanica* | 52 | Least Concern | Least Concern |
| Reptiles | Squamata | *Vipera aspis* | 8 | Least Concern | Least Concern |
| Reptiles | Squamata | *Zamenis lineatus* | 1 | Least Concern | Least Concern |
| Reptiles | Squamata | *Zamenis longissimus* | 8 | Least Concern | Least Concern |
| Reptiles | Testudines | *Testudo hermanni* | 1 | Near Threatened | Endangered |
| **TOTAL** |  |  | **2042** |  |  |

**Table S4**. Variables included in the total model.

| **Cat ID** | **N° prey** | **Ecoregion** | **Latitude** | **Distance from countryside (m)** | **Hours/day outside** | **Tinkerbell** | **Sex** |
| --- | --- | --- | --- | --- | --- | --- | --- |
| 1 | 28 | Mediterranean | 44.119812 | 930 | 14 | 2 | 1 |
| 2 | 16 | Continental | 43.833605 | 788 | 8 | 2 | 2 |
| 3 | 41 | Mediterranean | 43.083386 | 720 | 24 | 1 | 2 |
| 4 | 59 | Alpine | 45.966200 | 150 | 24 | 1 | 1 |
| 5 | 31 | Alpine | 46.118129 | 825 | 15 | 2 | 2 |
| 6 | 7 | Continental | 44.147416 | 1152 | 3 | 1 | 1 |
| 7 | 49 | Mediterranean | 39.975495 | 512 | 24 | 1 | 1 |
| 8 | 16 | Mediterranean | 43.605999 | 1029 | 6 | 2 | 2 |
| 9 | 18 | Mediterranean | 43.050837 | 1080 | 10 | 1 | 2 |
| 10 | 21 | Continental | 44.006734 | 812 | 10 | 1 | 1 |
| 11 | 16 | Continental | 45.204897 | 1085 | 6 | 2 | 2 |
| 12 | 35 | Mediterranean | 42.490264 | 810 | 20 | 1 | 1 |
| 13 | 38 | Mediterranean | 43.704445 | 800 | 22 | 1 | 1 |
| 14 | 23 | Mediterranean | 43.083214 | 900 | 15 | 2 | 1 |
| 15 | 22 | Alpine | 45.015962 | 852 | 10 | 1 | 2 |
| 16 | 20 | Alpine | 45.307006 | 930 | 10 | 1 | 2 |
| 17 | 22 | Mediterranean | 41.869584 | 925 | 10 | 2 | 2 |
| 18 | 44 | Mediterranean | 41.977008 | 477 | 24 | 2 | 2 |
| 19 | 81 | Continental | 44.785400 | 29 | 24 | 2 | 1 |
| 20 | 41 | Alpine | 45.797407 | 750 | 24 | 2 | 1 |
| 21 | 47 | Alpine | 46.075136 | 575 | 19 | 2 | 1 |

**Table S5**. Factors affecting the number of prey items brought home by domestic cats in one year (total model, R2 = 0.93). Asterisks indicate significant P (* < 0.05; ** <0.001).

| **Variable** | **B** | **Standard error** | **P** |
| --- | --- | --- | --- |
| Latitude | 1.51 | 1.66 | 0.38 |
| Ecoregion (Continental) | 4.52 | 4.83 | 0.37 |
| Ecoregion (Alpine) | 5.24 | 3.12 | 0.36 |
| Ecoregion (Mediterranean) | 6.43 | 4.39 | 0.33 |
| Distance from the countryside | -0.03 | 0.01 | 0.001** |
| Hours/day outside | 0.98 | 0.39 | 0.03* |
| Presence of a collar bell | -0.14 | 2.71 | 0.96 |
| Sex | 0.045 | 2.96 | 0.96 |
| *Intercept* | *-24.62* | *4.37* | *0.74* |
